# Supplementary material for: Clinicopathological Features as Prognostic Predictors of Poor Outcome in Papillary Thyroid Carcinoma
Source: MDPI journal article supplement (doi:10.3390/cancers12113186), 2020-10-29

# Supplementary Materials: Clinicopathological Features as Prognostic Predictors of Poor Outcome in Papillary Thyroid Carcinoma

Antónia Afonso Póvoa, Elisabete Teixeira, Maria Rosa Bella-Cueto, Miguel Melo, Maria João Oliveira, Manuel Sobrinho-Simões, Jorge Maciel and Paula Soares

**Table S1.** Histopathological variables and considered criteria.

| Analyzed Category               | Criteria                                                                                                                                                                                   | Evaluation        |
|---------------------------------|--------------------------------------------------------------------------------------------------------------------------------------------------------------------------------------------|-------------------|
| Poorly differentiated component | percentage within the primary tumor                                                                                                                                                        | %                 |
| Oncocytic component             | polygonal shape cells, with large (three times the nucleus) eosinophilic and granular cytoplasm                                                                                            | %                 |
| Solid component                 | compact cell distribution or in trabecular disposition, without follicle formation                                                                                                         | %                 |
| Papillae                        | papillary architecture, with neoplastic cells covering fibrovascular stalks                                                                                                                | %                 |
| Inflammatory infiltrate         | may range from only few isolated lymphocytes within the tumor or in its periphery, always less than 10 cells aggregated, to large lymphocytes groups that occupy at least 20% of the tumor | Absent/present    |
| Fibrosis                        | all kinds: sclerosing, desmoplastic, hyaline tracts, central post ischemic, central hyalinization, wide fibrovascular stalks                                                               | %                 |
| Psammoma bodies                 | when present, even if it's just one                                                                                                                                                        | Absent/present    |
| Dystrophic calcification        | irregular shape calcification, whose size is bigger than psammoma bodies, no spherical or concentric shape                                                                                 | Absent/present    |
| Necrosis                        | presence of focal ischemic or lytic necrosis                                                                                                                                               | Absent/present    |
| Tumor peripheric location       | a. A-tumor is close (1–3 mm) to thyroid capsule without reaching it and 50% of the tumor is located more than 10mm of the thyroid capsule                                                  | A                 |
|                                 | b. B-tumor contacts thyroid capsule or is close to it (1–3mm) and 50% of the tumor is located less than 10 mm of the thyroid capsule                                                       | B                 |
|                                 | c. No-tumor is located at more than 3 mm of thyroid capsule                                                                                                                                | C                 |
| Tumor capsule invasion          | tumor cells beyond tumor capsule<br>a. Minimal–or less invasive foci                                                                                                                       | Minimal/Extensive |

| b. Extensive—more than 3 invasive foci |                                                                                                                                                                           |                        |
|----------------------------------------|---------------------------------------------------------------------------------------------------------------------------------------------------------------------------|------------------------|
| Analyzed category                      | Criteria                                                                                                                                                                  | Evaluation             |
| Tumor growth                           | a. Expansive—more than 95% of the tumor has regular limit                                                                                                                 | Expansive/Infiltrative |
|                                        | b. Infiltrative—more than 5% of the tumor has infiltrative border                                                                                                         |                        |
| Extra-thyroidal extension              | tumor cells beyond thyroid capsule                                                                                                                                        | Minimal/ Gross         |
|                                        | a. Minimal—affects fibroadipose tissue with prominent vessels or nerves surrounding thyroid gland                                                                         |                        |
|                                        | b. Gross—affects strap muscles                                                                                                                                            |                        |
| Lymphatic invasion                     | a. Yes—mesothelial cover of the invaded vessel                                                                                                                            | Yes                    |
|                                        | b. Doubtful—round structure apart from the tumor, in relation with artery or vein, or that forms a longitudinal path inside the thyroid gland apart from the tumor        | No                     |
|                                        | c. No?                                                                                                                                                                    | Doubtful               |
| Venous invasion                        | 1. venous invasion of tumor capsule vessels or outside the thyroid capsule                                                                                                | Absent/present         |
| NIFTP                                  | capsulated or well delimited tumor, follicular patterned, with papillary-like nucleus, without capsular or vascular invasion and without solid/trabecular/insular pattern | Absent/present         |

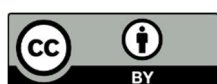

Supplement: s1 [file s1]
